# Supplementary material for: A multi-scale circuit model bridges molecular modeling and experimental measurements of conductive metal–organic framework supercapacitors
Source: Royal Society of Chemistry journal article supplement (doi:10.1039/d4cp02487g), 2024-12-11
Supplement: d4cp02487g1.pdf [file d4cp02487g1.pdf]

*Supplementary Information*

**Multi-scale circuit model bridges molecular modeling and  
experimental measurements of conductive metal-organic framework  
supercapacitors**

Liang Niu<sup>a</sup>, Zhou Liu<sup>a</sup>, Ding Yu<sup>a</sup>, Volker Presser<sup>b,c,d</sup>, Ming Chen<sup>a</sup>, Guang Feng<sup>a,\*</sup>

<sup>a</sup> State Key Laboratory of Coal Combustion, School of Energy and Power Engineering, Huazhong University of Science and Technology (HUST), 430074 Wuhan, China

<sup>b</sup> INM – Leibniz Institute for New Materials, Campus D2 2, 66123, Saarbrücken, Germany

<sup>c</sup> Department of Materials Science and Engineering, Saarland University, Campus D2 2, 66123, Saarbrücken, Germany

<sup>d</sup> saarene – Saarland Center for Energy Materials and Sustainability, Campus C4 2, 66123, Saarbrücken, Germany

\*Corresponding author: [gfeng@hust.edu.cn](mailto:gfeng@hust.edu.cn)

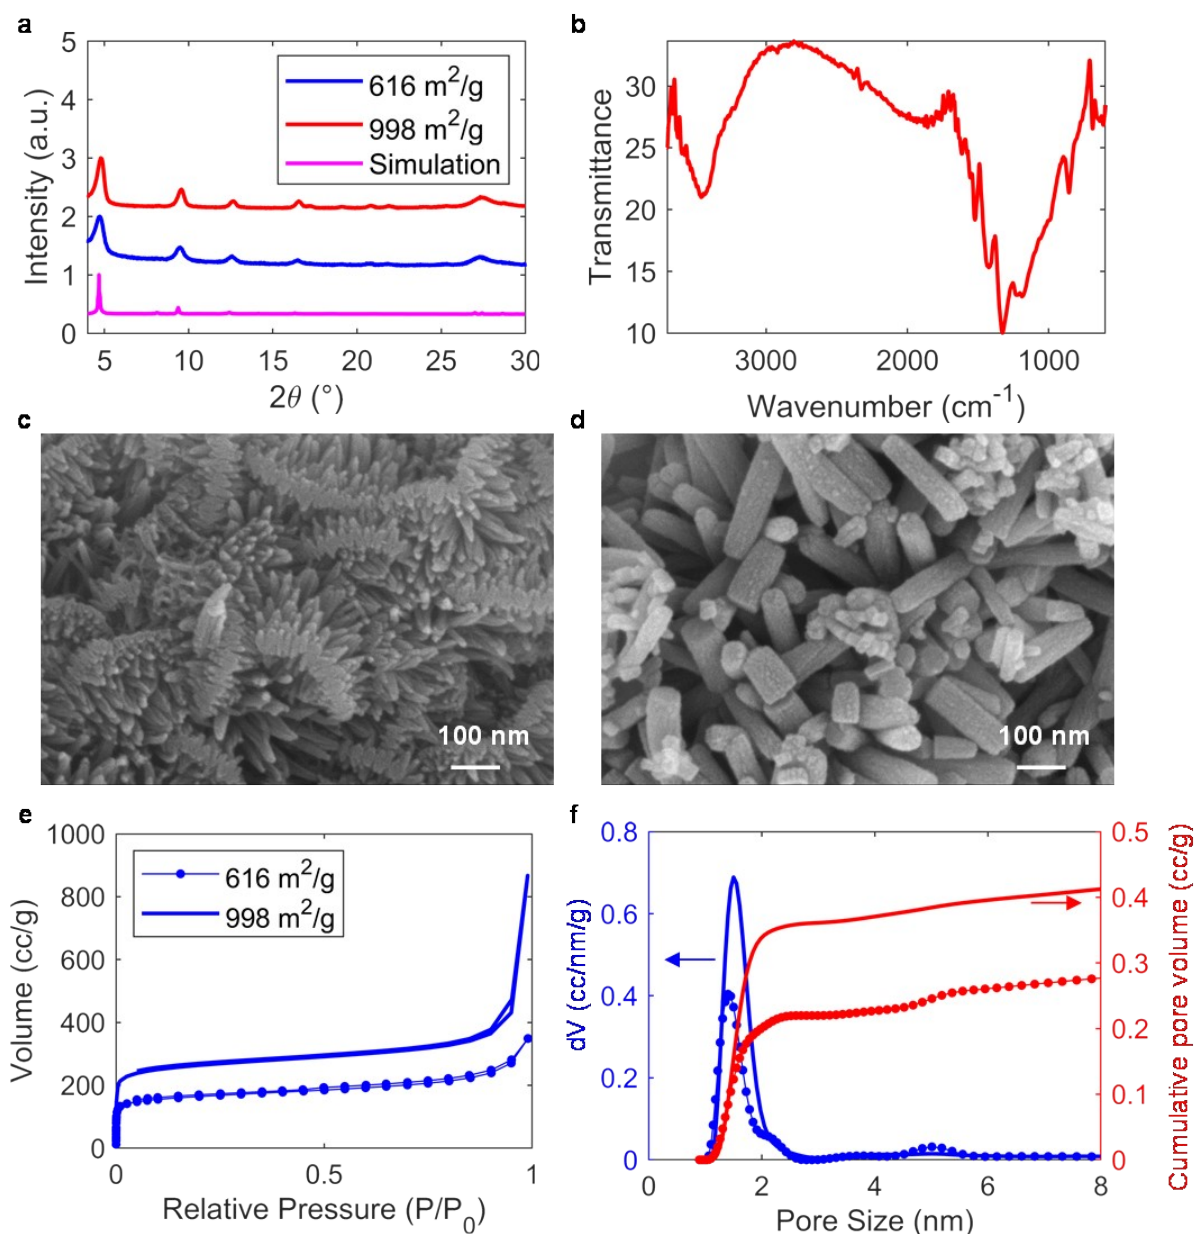

**Figure S1. Characterization of conductive MOF with different SSA.** **a**, Experimental and simulated XRD patterns of  $\text{Ni}_3(\text{HITP})_2$ . **b**, FTIR of  $\text{Ni}_3(\text{HITP})_2$  with a specific surface area of  $998 \text{ m}^2/\text{g}$ . **c-d**, Scanning electron micrographs of  $\text{Ni}_3(\text{HITP})_2$  in specific surface areas (SSAs) of **(c)**,  $616 \text{ m}^2/\text{g}$  **(d)**,  $998 \text{ m}^2/\text{g}$ . The length and diameter of MOF with higher SSA are significantly increased while the number of rod-like crystallites is noticeably reduced. **e**,  $\text{N}_2$  adsorption isotherm of different  $\text{Ni}_3(\text{HITP})_2$  at 77 K. The SSA was computed from these isotherms as 616 and  $998 \text{ m}^2/\text{g}$  using the Brunauer-Emmett-Teller method. **f**, Pore size distribution and cumulative pore volume of different  $\text{Ni}_3(\text{HITP})_2$  calculated from the isotherms with the quenched solid density functional theory.

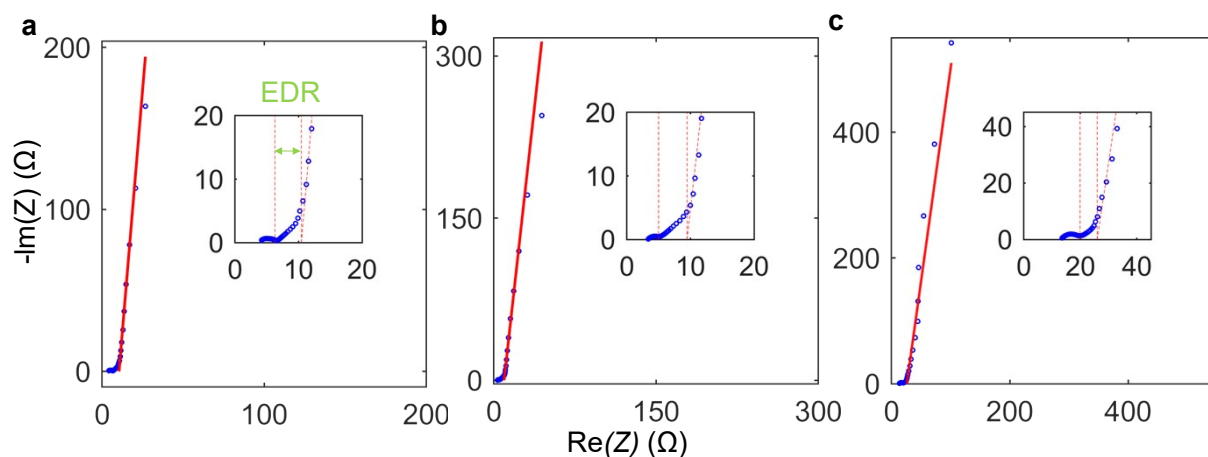

**Figure S2.** Nyquist plot from EIS test for c-MOF. **a-c**, Results of using a value for the crystallinity of 0.87 (a), 0.53 (b), or 0.30 (c). The method for extracting the equivalent distributed resistance is shown by the red dashed line.

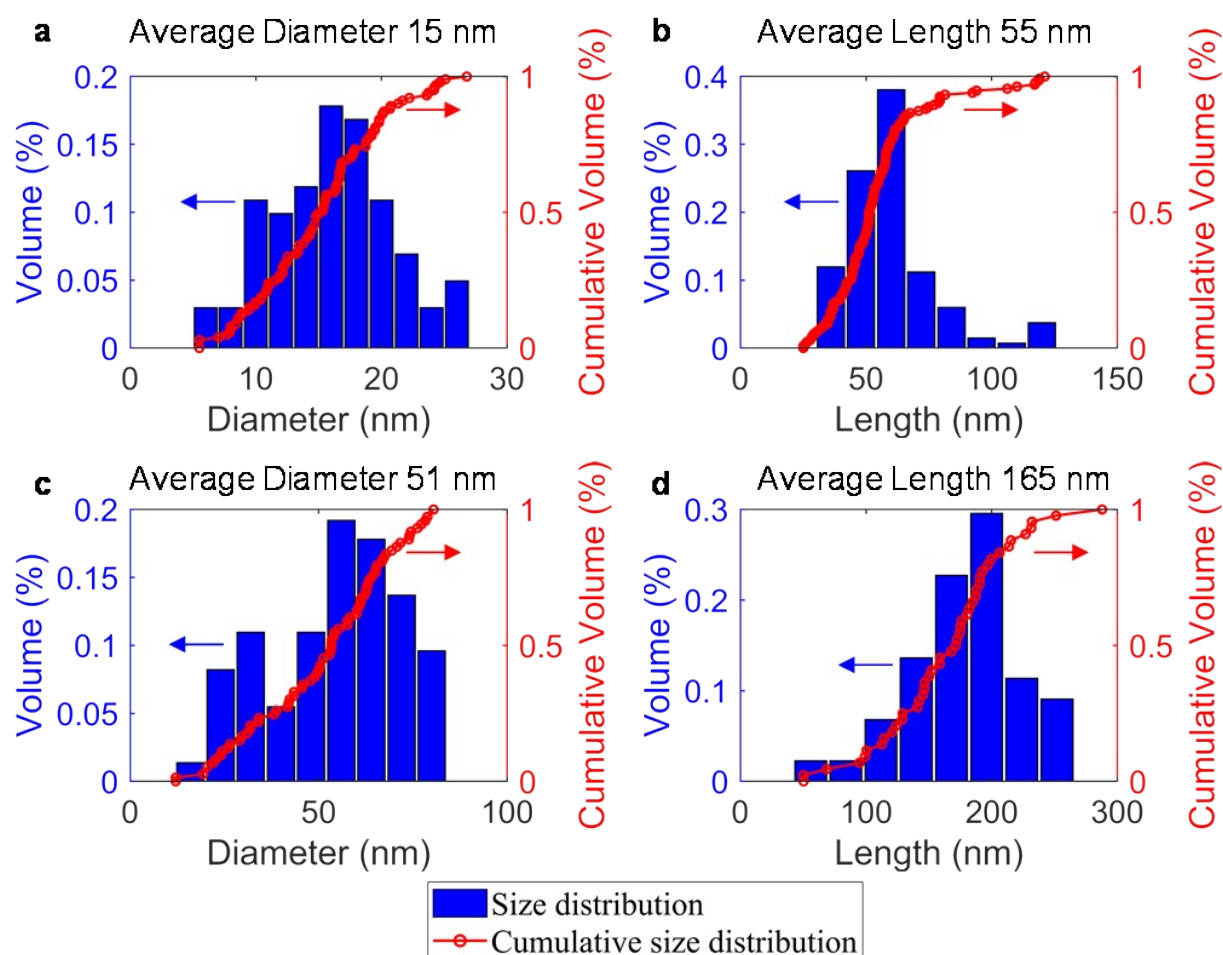

**Figure S3. Diameter and Length Statistics of conductive MOF crystal rods.** **a-b**, Size distribution and cumulative size distribution of  $\text{Ni}_3(\text{HITP})_2$  in SSA of  $616 \text{ m}^2/\text{g}$ . **c-d**, Size distribution and cumulative size distribution of  $\text{Ni}_3(\text{HITP})_2$  in SSA of  $998 \text{ m}^2/\text{g}$ .

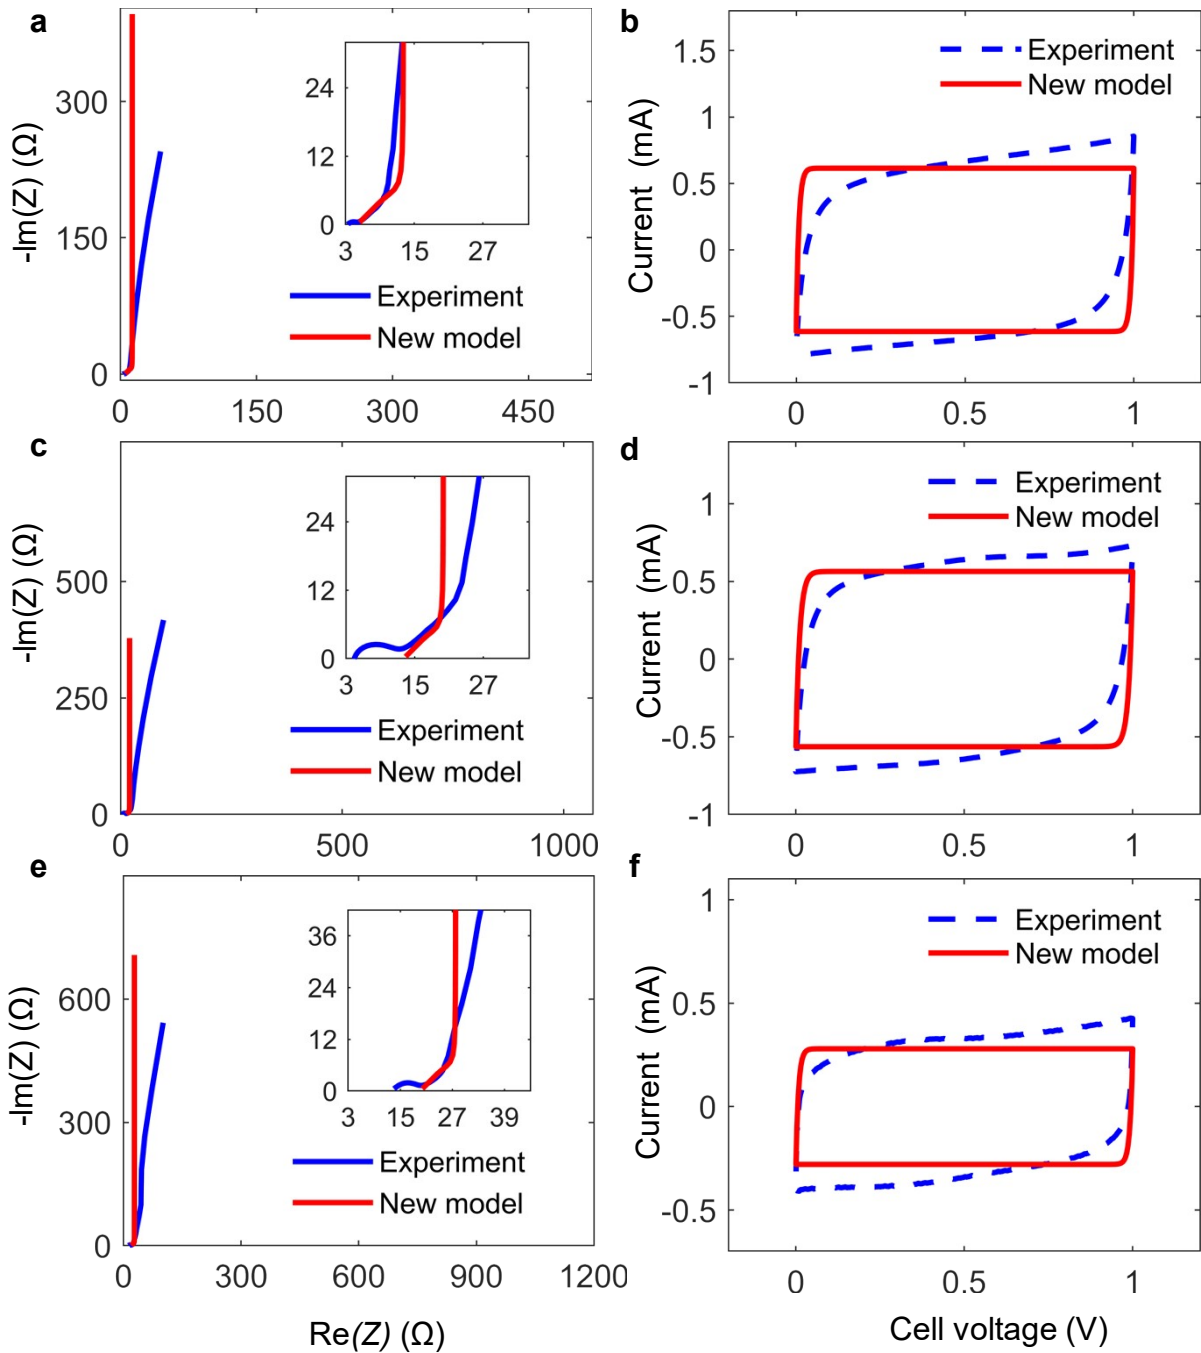

**Figure S4. The comparison of the experiment to a multi-scale circuit model.** Nyquist curves of experimental EIS test (blue line) and our model (red line) for samples 2-4 (a, c, e). CV curves of the experiment (blue dashed line) and multi-scale circuit model (red solid line) for samples 2-4 (b, d, f)

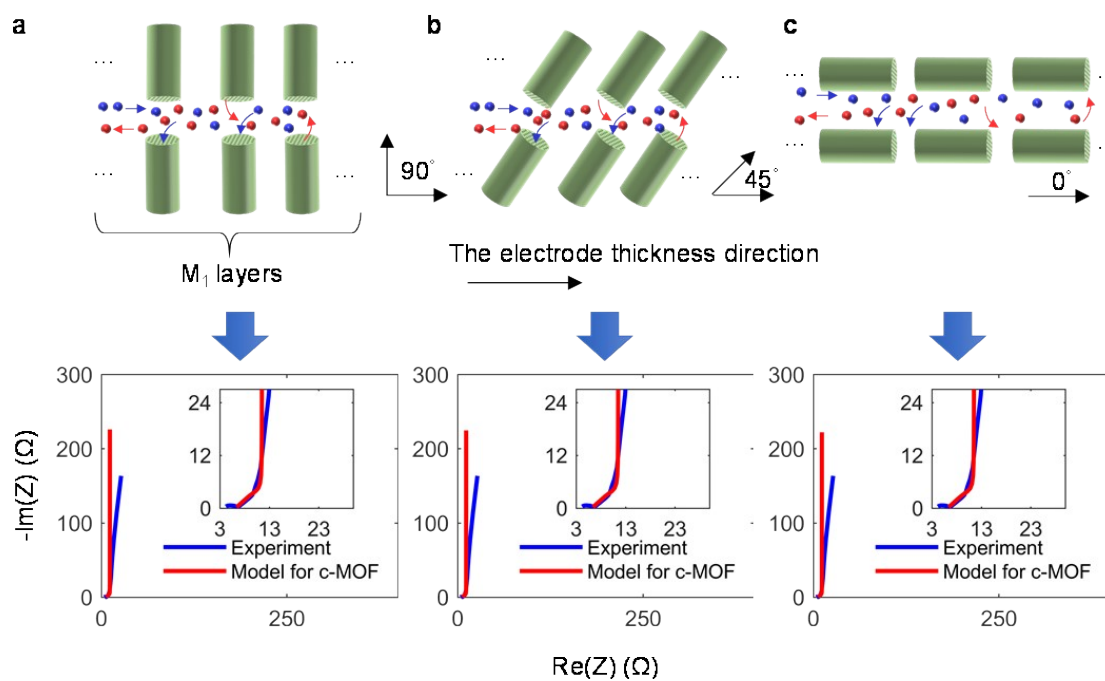

**Figure S5** The influence of crystal orientation on the model's results. Schematic diagrams of crystal orientation and the corresponding Nyquist curves for the model when **a**  $\alpha=1$ , **b**  $\alpha=1.6$ , and **c**  $\alpha=3.2$ .

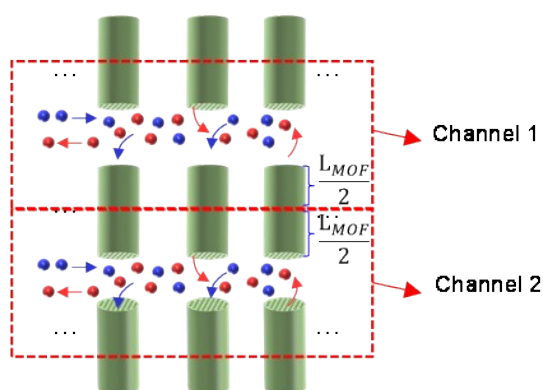

**Figure S6** A schematic diagram of the relationship between the ion transport channel and the c-MOF crystal.
